# Supplementary material
Source: ML conference proceedings conference paper supplement (https://proceedings.mlr.press/v80/niculae18a.html)
Supplement: Supplementary file [file niculae18a-supp.pdf]

# Supplementary material

## A. Implementation Details for SparseMAP Solvers

### A.1. Conditional Gradient Variants

We adapt the presentation of vanilla, away-step and pairwise conditional gradient of [Lacoste-Julien & Jaggi \(2015\)](#).

Recall the SparseMAP optimization problem (Equation 5), which we rewrite below as a minimization, to align with the formulation in ([Lacoste-Julien & Jaggi, 2015](#))

$$\text{SparseMAP}_A(\eta) := \arg \min_{\mathbf{u}: [\mathbf{u}, \mathbf{v}] \in \mathcal{M}_A} f(\mathbf{u}, \mathbf{v}), \quad \text{where } f(\mathbf{u}, \mathbf{v}) := \frac{1}{2} \|\mathbf{u}\|_2^2 - \eta_U^\top \mathbf{u} - \eta_F^\top \mathbf{v}.$$

The gradients of the objective function  $f$  w.r.t. the two variables are

$$\nabla_{\mathbf{u}} f(\mathbf{u}', \mathbf{v}') = \mathbf{u}' - \eta_U, \quad \nabla_{\mathbf{v}} f(\mathbf{u}', \mathbf{v}') = -\eta_V.$$

The ingredients required to apply conditional gradient algorithms are solving linear minimization problem, selecting the away step, computing the Wolfe gap, and performing line search.

**Linear minimization problem.** For SparseMAP, this amounts to a MAP inference call, since

$$\begin{aligned} & \arg \min_{[\mathbf{u}, \mathbf{v}] \in \mathcal{M}_A} \langle \nabla_{\mathbf{u}} f(\mathbf{u}', \mathbf{v}'), \mathbf{u} \rangle + \langle \nabla_{\mathbf{v}} f(\mathbf{u}', \mathbf{v}'), \mathbf{v} \rangle \\ &= \arg \min_{[\mathbf{u}, \mathbf{v}] \in \mathcal{M}_A} (\mathbf{u}' - \eta_U)^\top \mathbf{u} - \eta_F^\top \mathbf{v} \\ &= \{[\mathbf{m}_s; \mathbf{n}_s] : s \in \text{MAP}_A(\eta_U - \mathbf{u}', \eta_F)\}. \end{aligned}$$

where we assume  $\text{MAP}_A$  yields the set of maximally-scoring structures.

**Away step selection.** This step involves searching the currently selected structures in the active set  $\mathcal{I}$  with the *opposite* goal: finding the structure *maximizing* the linearization

$$\begin{aligned} & \arg \max_{s \in \mathcal{I}} \langle \nabla_{\mathbf{u}} f(\mathbf{u}', \mathbf{v}'), \mathbf{m}_s \rangle + \langle \nabla_{\mathbf{v}} f(\mathbf{u}', \mathbf{v}'), \mathbf{n}_s \rangle \\ &= \arg \max_{s \in \mathcal{I}} (\mathbf{u}' - \eta_U)^\top \mathbf{m}_s - \eta_F^\top \mathbf{n}_s \end{aligned}$$

**Wolfe gap.** The gap at a point  $\mathbf{d} = [\mathbf{d}_u; \mathbf{d}_v]$  is given by

$$\begin{aligned} \text{gap}(\mathbf{d}, \mathbf{u}') &:= \langle -\nabla_{\mathbf{u}} f(\mathbf{u}', \mathbf{v}'), \mathbf{d}_u \rangle + \langle -\nabla_{\mathbf{v}} f(\mathbf{u}', \mathbf{v}'), \mathbf{d}_v \rangle \\ &= \langle \eta_U - \mathbf{u}', \mathbf{d}_u \rangle + \langle \eta_F, \mathbf{d}_v \rangle. \end{aligned} \tag{7}$$

**Line search.** Once we have picked a direction  $\mathbf{d} = [\mathbf{d}_u; \mathbf{d}_v]$ , we can pick the optimal step size by solving a simple optimization problem. Let  $\mathbf{u}_\gamma := \mathbf{u}' + \gamma \mathbf{d}_u$ , and  $\mathbf{v}_\gamma := \mathbf{v}' + \gamma \mathbf{d}_v$ . We seek  $\gamma$  so as to optimize

$$\arg \min_{\gamma \in [0, \gamma_{\max}]} f(\mathbf{u}_\gamma, \mathbf{v}_\gamma)$$

Setting the gradient w.r.t.  $\gamma$  to 0 yields

$$\begin{aligned} 0 &= \frac{\partial}{\partial \gamma} f(\mathbf{u}_\gamma, \mathbf{v}_\gamma) \\ &= \langle \mathbf{d}_u, \nabla_{\mathbf{u}} f(\mathbf{u}_\gamma, \mathbf{v}_\gamma) \rangle + \langle \mathbf{d}_v, \nabla_{\mathbf{v}} f(\mathbf{u}_\gamma, \mathbf{v}_\gamma) \rangle \\ &= \langle \mathbf{d}_u, \mathbf{u}' + \gamma \mathbf{d}_u - \eta_U \rangle + \langle \mathbf{d}_v, -\eta_F \rangle \\ &= \gamma \|\mathbf{d}_u\|_2^2 + \mathbf{u}'^\top \mathbf{d}_u - \eta^\top \mathbf{d} \end{aligned}$$

We may therefore compute the optimal step size  $\gamma$  as

$$\gamma = \max \left( 0, \min \left( \gamma_{\max}, \frac{\boldsymbol{\eta}^\top \mathbf{d} - \mathbf{u}'^\top \mathbf{d}_u}{\|\mathbf{d}_u\|_2^2} \right) \right) \quad (8)$$

---

**Algorithm 1** Conditional gradient for SparseMAP
 

---

```

1: Initialization:  $s^{(0)} \leftarrow \text{MAP}_{\mathcal{A}}(\boldsymbol{\eta}_U, \boldsymbol{\eta}_F)$ ;  $\mathcal{I}^{(0)} = \{s^{(0)}\}$ ;  $\mathbf{y}^{(0)} = \mathbf{e}_{s^{(0)}}$ ;  $[\mathbf{u}^{(0)}; \mathbf{v}^{(0)}] = \mathbf{a}_{s^{(0)}}$ 
2: for  $t = 0 \dots t_{\max}$  do
3:    $s \leftarrow \text{MAP}_{\mathcal{A}}(\boldsymbol{\eta}_U - \mathbf{u}^{(t)}, \boldsymbol{\eta}_F)$ ;
4:    $w \leftarrow \arg \max_{w \in \mathcal{I}^{(t)}} (\boldsymbol{\eta}_U - \mathbf{u}^{(t)})^\top \mathbf{m}_w + \boldsymbol{\eta}_F^\top \mathbf{n}_w$ ;
5:    $\mathbf{d}^F \leftarrow \mathbf{a}_s - [\mathbf{u}^{(t)}; \mathbf{v}^{(t)}]$  (forward direction)
6:    $\mathbf{d}^W \leftarrow [\mathbf{u}^{(t)}; \mathbf{v}^{(t)}] - \mathbf{a}_w$  (away direction)
7:   if  $\text{gap}(\mathbf{d}^F, \mathbf{u}^{(t)}) < \epsilon$  then
8:     return  $\mathbf{u}^{(t)}$  (Equation 7)
9:   end if
10:  if variant = vanilla then
11:     $\mathbf{d} \leftarrow \mathbf{d}^F$ ;  $\gamma_{\max} \leftarrow 1$ 
12:  else if variant = pairwise then
13:     $\mathbf{d} \leftarrow \mathbf{d}^F + \mathbf{d}^W$ ;  $\gamma_{\max} \leftarrow y_w$ 
14:  else if variant = away-step then
15:    if  $\text{gap}(\mathbf{d}^F, \mathbf{u}^{(t)}) \geq \text{gap}(\mathbf{d}^W, \mathbf{u}^{(t)})$  then
16:       $\mathbf{d} \leftarrow \mathbf{d}^F$ ;  $\gamma_{\max} \leftarrow 1$ 
17:    else
18:       $\mathbf{d} \leftarrow \mathbf{d}^A$ ;  $\gamma_{\max} \leftarrow y_w / (1 - y_w)$ 
19:    end if
20:  end if
21:  Compute step size  $\gamma$  (Equation 8)
22:   $[\mathbf{u}^{(t+1)}; \mathbf{v}^{(t+1)}] \leftarrow [\mathbf{u}^{(t)}; \mathbf{v}^{(t)}] + \gamma \mathbf{d}$ 
23:  Update  $\mathcal{I}^{(t+1)}$  and  $\mathbf{y}^{(t+1)}$  accordingly.
24: end for
    
```

---

## A.2. The Active Set Algorithm

We use a variant of the active set algorithm (Nocedal & Wright, 1999, Ch. 16.4 & 16.5) as proposed for the quadratic subproblems of the AD<sup>3</sup> algorithm; our presentation follows (Martins et al., 2015, Algorithm 3). At each step, the active set algorithm solves a relaxed variant of the SparseMAP QP, relaxing the non-negativity constraint on  $\mathbf{y}$ , and restricting the solution to the current active set  $\mathcal{I}$

$$\text{minimize}_{\mathbf{y}_{\mathcal{I}} \in \mathbb{R}^{|\mathcal{I}|}} \frac{1}{2} \|\mathbf{M}_{\mathcal{I}} \mathbf{y}_{\mathcal{I}}\|_2^2 - \boldsymbol{\eta}^\top \mathbf{A}_{\mathcal{I}} \mathbf{y}_{\mathcal{I}} \quad \text{subject to} \quad \mathbf{1}^\top \mathbf{y}_{\mathcal{I}} = 1$$

whose solution can be found by solving the KKT system

$$\begin{bmatrix} \mathbf{M}_{\mathcal{I}}^\top \mathbf{M}_{\mathcal{I}} & \mathbf{1} \\ \mathbf{1}^\top & 0 \end{bmatrix} \begin{bmatrix} \mathbf{y}_{\mathcal{I}} \\ \tau \end{bmatrix} = \begin{bmatrix} \mathbf{A}_{\mathcal{I}}^\top \boldsymbol{\eta} \\ 1 \end{bmatrix}. \quad (9)$$

At each iteration, the (symmetric) design matrix in Equation 9 is updated by adding or removing a row and a column; therefore its inverse (or a decomposition) may be efficiently maintained and updated.

**Line search.** The optimal step size for moving a feasible current estimate  $\mathbf{y}'$  toward a solution  $\hat{\mathbf{y}}$  of Equation 9, while keeping feasibility, is given by (Martins et al., 2015, Equation 31)

$$\gamma = \min \left( 1, \min_{s \in \mathcal{I}, y'_s > \hat{y}_s} \frac{y'_s}{y'_s - \hat{y}_s} \right) \quad (10)$$

When  $\gamma \leq 1$  this update zeros out a coordinate of  $\mathbf{y}'$ ; otherwise,  $\mathcal{I}$  remains the same.

**Algorithm 2** Active Set algorithm for SparseMAP

---

```

1: Initialization:  $s^{(0)} \leftarrow \text{MAP}_A(\eta_U, \eta_F)$ ;  $\mathcal{I}^{(0)} = \{s^{(0)}\}$ ;  $\mathbf{y}^{(0)} = \mathbf{e}_{s^{(0)}}$ ;  $[\mathbf{u}^{(0)}; \mathbf{v}^{(0)}] = \mathbf{a}_{s^{(0)}}$ 
2: for  $t = 0 \dots t_{\max}$  do
3:   Solve the relaxed QP restricted to  $\mathcal{I}^{(t)}$ ; get  $\hat{\mathbf{y}}, \hat{\tau}, \hat{\mathbf{u}} = M\hat{\mathbf{y}}$  (Equation 9)
4:   if  $\hat{\mathbf{y}} = \mathbf{y}^{(t)}$  then
5:      $s \leftarrow \text{MAP}_A(\eta_U - \hat{\mathbf{u}}, \eta_F)$ 
6:     if  $\text{gap}(\mathbf{a}_s, \hat{\mathbf{u}}) \leq \hat{\tau}$  then
7:       return  $\mathbf{u}^{(t)}$  (Equation 7)
8:     else
9:        $\mathcal{I}^{(t+1)} \leftarrow \mathcal{I}^{(t)} \cup \{s\}$ 
10:    end if
11:  else
12:    Compute step size  $\gamma$  (Equation 10)
13:     $\mathbf{y}^{(t+1)} \leftarrow (1 - \gamma)\mathbf{y}^{(t)} + \gamma\hat{\mathbf{y}}$  (sparse update)
14:    Update  $\mathcal{S}^{(t+1)}$  if necessary
15:  end if
16: end for

```

---

## B. Computing the SparseMAP Jacobian: Proof of Proposition 1

Recall that SparseMAP is defined as the  $\mathbf{u}^*$  that maximizes the value of the quadratic program (Equation 5),

$$g(\eta_U, \eta_F) := \max_{[\mathbf{u}; \mathbf{v}] \in \mathcal{M}_A} \eta_U^\top \mathbf{u} + \eta_F^\top \mathbf{v} - \frac{1}{2} \|\mathbf{u}\|_2^2. \quad (11)$$

As the  $\ell_2^2$  norm is strongly convex, there is always a unique minimizer  $\mathbf{u}^*$  (implying that SparseMAP is well-defined), and the convex conjugate of the QP in (11),  $g^*(\mathbf{u}, \mathbf{v}) = \{\frac{1}{2} \|\mathbf{u}\|_2^2, [\mathbf{u}; \mathbf{v}] \in \mathcal{M}_A; -\infty \text{ otherwise}\}$  is smooth in  $\mathbf{u}$ , implying that SparseMAP (which only returns  $\mathbf{u}$ ) is Lipschitz-continuous and thus differentiable almost everywhere.

We now rewrite the QP in Equation 11 in terms of the convex combination of vertices of the marginal polytope

$$\min_{\mathbf{y} \in \Delta^D} \frac{1}{2} \|M\mathbf{y}\|_2^2 - \boldsymbol{\theta}^\top \mathbf{y} \quad \text{where } \boldsymbol{\theta} := A^\top \boldsymbol{\eta} \quad (12)$$

We use the optimality conditions of problem 12 to derive an explicit relationship between  $\mathbf{u}^*$  and  $\mathbf{x}$ . At an optimum, the following KKT conditions hold

$$M^\top M\mathbf{y}^* - \boldsymbol{\lambda}^* + \tau^* \mathbf{1} = \mathbf{0} \quad (13)$$

$$\mathbf{1}^\top \mathbf{y}^* = 1 \quad (14)$$

$$\mathbf{y}^* \geq \mathbf{0} \quad (15)$$

$$\boldsymbol{\lambda}^* \geq \mathbf{0} \quad (16)$$

$$\boldsymbol{\lambda}^{*\top} \mathbf{y}^* = 0 \quad (17)$$

Let  $\mathcal{I}$  denote the support of  $\mathbf{y}^*$ , i.e.,  $\mathcal{I} = \{s : y_s^* > 0\}$ . From Equation 17 we have  $\boldsymbol{\lambda}_{\mathcal{I}} = \mathbf{0}$  and therefore

$$M_{\mathcal{I}}^\top M_{\mathcal{I}} \mathbf{y}_{\mathcal{I}}^* + \tau^* \mathbf{1} = \boldsymbol{\theta}_{\mathcal{I}} \quad (18)$$

$$\mathbf{1}^\top \mathbf{y}_{\mathcal{I}}^* = 1 \quad (19)$$

Solving for  $\mathbf{y}_{\mathcal{I}}^*$  in Equation 18 we get a direct expression

$$\mathbf{y}_{\mathcal{I}}^* = (M_{\mathcal{I}}^\top M_{\mathcal{I}})^{-1} (\boldsymbol{\theta}_{\mathcal{I}} - \tau^* \mathbf{1}) = \mathbf{Z} (\boldsymbol{\theta}_{\mathcal{I}} - \tau^* \mathbf{1}).$$

where we introduced  $\mathbf{Z} = (\mathbf{M}^\top \mathbf{M})^{-1}$ . Solving for  $\tau^*$  yields

$$\tau^* = \frac{1}{\mathbf{1}^\top \mathbf{Z} \mathbf{1}} (\mathbf{1}^\top \mathbf{Z} \boldsymbol{\theta}_{\mathcal{I}} - 1)$$

Plugging this back and left-multiplying by  $\mathbf{M}_{\mathcal{I}}$  we get

$$\mathbf{u}^* = \mathbf{M}_{\mathcal{I}} \mathbf{y}_{\mathcal{I}}^* = \mathbf{M}_{\mathcal{I}} \mathbf{Z} \left( \boldsymbol{\theta}_{\mathcal{I}} - \frac{1}{\mathbf{1}^\top \mathbf{Z} \mathbf{1}} \mathbf{1}^\top \mathbf{Z} \boldsymbol{\theta}_{\mathcal{I}} \mathbf{1} + \frac{1}{\mathbf{1}^\top \mathbf{Z} \mathbf{1}} \mathbf{1} \right)$$

Note that, in a neighborhood of  $\boldsymbol{\eta}$ , the support of the solution  $\mathcal{I}$  is constant. (On the measure-zero set of points where the support changes, SparseMAP is subdifferentiable and our assumption yields a generalized Jacobian (Clarke, 1990).) Differentiating w.r.t. the score of a configuration  $\theta_s$ , we get the expression

$$\frac{\partial \mathbf{u}^*}{\partial \theta_s} = \begin{cases} \mathbf{M} \left( \mathbf{I} - \frac{1}{\mathbf{1}^\top \mathbf{Z} \mathbf{1}} \mathbf{Z} \mathbf{1} \mathbf{1}^\top \right) \mathbf{z}_s & s \in \mathcal{I} \\ \mathbf{0} & s \notin \mathcal{I} \end{cases} \quad (20)$$

Since  $\theta_s = \mathbf{a}_s^\top \boldsymbol{\eta}$ , by the chain rule, we get the desired result

$$\frac{\partial \mathbf{u}^*}{\partial \boldsymbol{\eta}} = \frac{\partial \mathbf{u}^*}{\partial \boldsymbol{\theta}} \mathbf{A}^\top. \quad (21)$$

### C. Fenchel-Young Losses: Proof of Proposition 2

We recall that the structured Fenchel-Young loss defined by a convex  $\Omega : \mathbb{R}^D \rightarrow \mathbb{R}$  and a matrix  $\mathbf{A}$  is defined as

$$\ell_{\Omega, \mathbf{A}} : \mathbb{R}^k \times \Delta^D \rightarrow \mathbb{R}, \quad \ell_{\Omega, \mathbf{A}}(\boldsymbol{\eta}, \mathbf{y}) := \Omega_\Delta^*(\mathbf{A}^\top \boldsymbol{\eta}) + \Omega_\Delta(\mathbf{y}) - \boldsymbol{\eta}^\top \mathbf{A} \mathbf{y}.$$

Since  $\Omega_\Delta$  is the restriction of a convex function to a convex set, it is convex (Boyd & Vandenberghe, 2004, Section 3.1.2).

**Property 1.** From the Fenchel-Young inequality (Fenchel, 1949; Boyd & Vandenberghe, 2004, Section 3.3.2), we have

$$\boldsymbol{\theta}^\top \mathbf{y} \leq \Omega_\Delta^*(\boldsymbol{\theta}) + \Omega_\Delta(\mathbf{y}).$$

In particular, when  $\boldsymbol{\theta} = \mathbf{A}^\top \boldsymbol{\eta}$ ,

$$\begin{aligned} 0 &\leq -\boldsymbol{\eta}^\top \mathbf{A} \mathbf{y} + \Omega_\Delta^*(\mathbf{A}^\top \boldsymbol{\eta}) + \Omega_\Delta(\mathbf{y}) \\ &= \ell_{\Omega, \mathbf{A}}(\boldsymbol{\eta}, \mathbf{y}). \end{aligned}$$

Equality is achieved when

$$\begin{aligned} \Omega_\Delta^*(\mathbf{A}^\top \boldsymbol{\eta}) &= \boldsymbol{\eta}^\top \mathbf{A} \mathbf{y} - \Omega_\Delta(\mathbf{y}) \iff \\ \max_{\mathbf{y}' \in \Delta^d} \boldsymbol{\eta}^\top \mathbf{A} \mathbf{y}' - \Omega(\mathbf{y}') &= \boldsymbol{\eta}^\top \mathbf{A} \mathbf{y} - \Omega(\mathbf{y}), \end{aligned}$$

where we used the fact that  $\mathbf{y} \in \Delta^d$ . The second part of the claim follows.

**Property 2.** To prove convexity in  $\boldsymbol{\eta}$ , we rewrite the loss, for fixed  $\mathbf{y}$ , as

$$\ell_{\Omega, \mathbf{A}}(\boldsymbol{\eta}) = h(\mathbf{A}^\top \boldsymbol{\eta}) + \text{const}, \quad \text{where } h(\boldsymbol{\theta}) = \Omega_\Delta^*(\boldsymbol{\theta}) - \boldsymbol{\theta}^\top \mathbf{y}.$$

$\Omega_\Delta^*$  is a convex conjugate, and thus itself convex. Linear functions are convex, and the sum of two convex functions is convex, therefore  $h$  is convex. Finally, the composition of a convex function with a linear function is convex as well, thus the function  $(h \mathbf{A}^\top)$  is convex. Convexity of  $\ell_{\Omega, \mathbf{A}}$  in  $\boldsymbol{\eta}$  directly follows. Convexity in  $\mathbf{y}$  is straightforward, as the sum of a convex and a linear function (Boyd & Vandenberghe, 2004, Sections 3.2.1, 3.2.2, 3.3.1).

**Property 3.** This follows from the scaling property of the convex conjugate (Boyd & Vandenberghe, 2004, Section 3.3.2)

$$(t\Omega)^*(\boldsymbol{\theta}) = t\Omega^*(t^{-1}\boldsymbol{\theta})$$

Denoting  $\boldsymbol{\eta}' = t^{-1}\boldsymbol{\eta}$ , we have that

$$\begin{aligned} \ell_{t\Omega, \mathbf{A}}(\boldsymbol{\eta}, \mathbf{y}) &= (t\Omega_\Delta)^*(\mathbf{A}^\top \boldsymbol{\eta}) + t\Omega_\Delta(\mathbf{y}) - \boldsymbol{\eta}^\top \mathbf{A} \mathbf{y} \\ &= t\Omega_\Delta^*(\mathbf{A}^\top \boldsymbol{\eta}') + t\Omega_\Delta(\mathbf{y}) - \boldsymbol{\eta}^\top \mathbf{A} \mathbf{y} \\ &= t(\Omega_\Delta^*(\mathbf{A}^\top \boldsymbol{\eta}') + \Omega_\Delta(\mathbf{y}) - \boldsymbol{\eta}'^\top \mathbf{A} \mathbf{y}) = t\ell_{\Omega, \mathbf{A}}(t^{-1}\boldsymbol{\eta}, \mathbf{y}). \end{aligned}$$
